# Supplementary material for: Effects of Miglitol, Acarbose, and Sitagliptin on Plasma Insulin and Gut Peptides in Type 2 Diabetes Mellitus: A Crossover Study
Source: Springer Nature journal article supplement (doi:10.1007/s13300-015-0113-3), 2015-06-01
Supplement: MOESM1 [file 9263330]

- A crossover design was used to examine the changes in gastrointestinal peptides and glucose metabolism in a single sample of eleven patients with type 2 diabetes mellitus (T2DM) following single administration of acarbose, miglitol, or sitagliptin.
- Early-phase insulin secretion was decreased following acarbose and miglitol, and the areas under the curve (AUC) of insulin at 180 minutes following acarbose and miglitol were significantly lower than sitagliptin.
- Postprandial plasma active glucagon-like peptide-1 (GLP-1) levels and AUC of GLP-1 increased significantly in both the sitagliptin and miglitol groups compared to control.
- Postprandial plasma total glucose-dependent insulintropic polypeptide levels increased following sitagliptin but decreased after acarbose and miglitol.
- Sitagliptin and  $\alpha$ -glucosidase inhibitors, miglitol more so than acarbose, improved hyperglycemia in patients with T2DM, and had different effects on insulin and incretin secretion.

This summary slide represents the opinions of the authors. This study was supported by a Grant-in-Aid for Clinical Research from Miyazaki University Hospital, whose support is deeply appreciated. For a full list of acknowledgments and conflicts of interest for all authors of this article, please see the full text online. Copyright © The Author(s) 2015. Creative Commons Attribution Noncommercial License (CC BY-NC).
